# Supplementary material
Source: PubMed Central journal article supplement (PMC3887812)

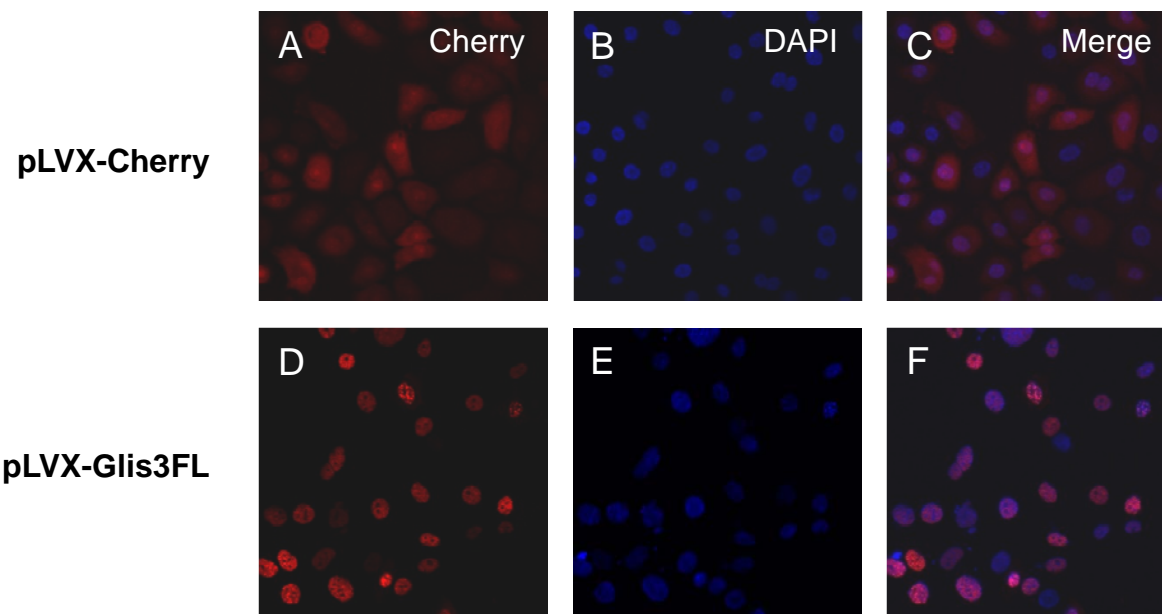

Supplement Fig. 1 Glis3 overexpression in human ductal cell line, HPDE

Supplement: molcell-34-2-193-12-supplementary.pdf [file molcell-34-2-193-12-supplementary.pdf]
